# Supplementary material
Source: PubMed Central journal article supplement (PMC3163950)
Supplement: JCI45472sd.pdf [file JCI45472sd.pdf]

## Supplemental Materials

**Supplemental Figure Legend 1.** (A) Net hepatic NEFA uptake, (B) arterial plasma glycerol, and (C) net hepatic glycerol uptake in 42h fasted conscious dogs. Values are means  $\pm$  SEM; n values same as for Figure 4.

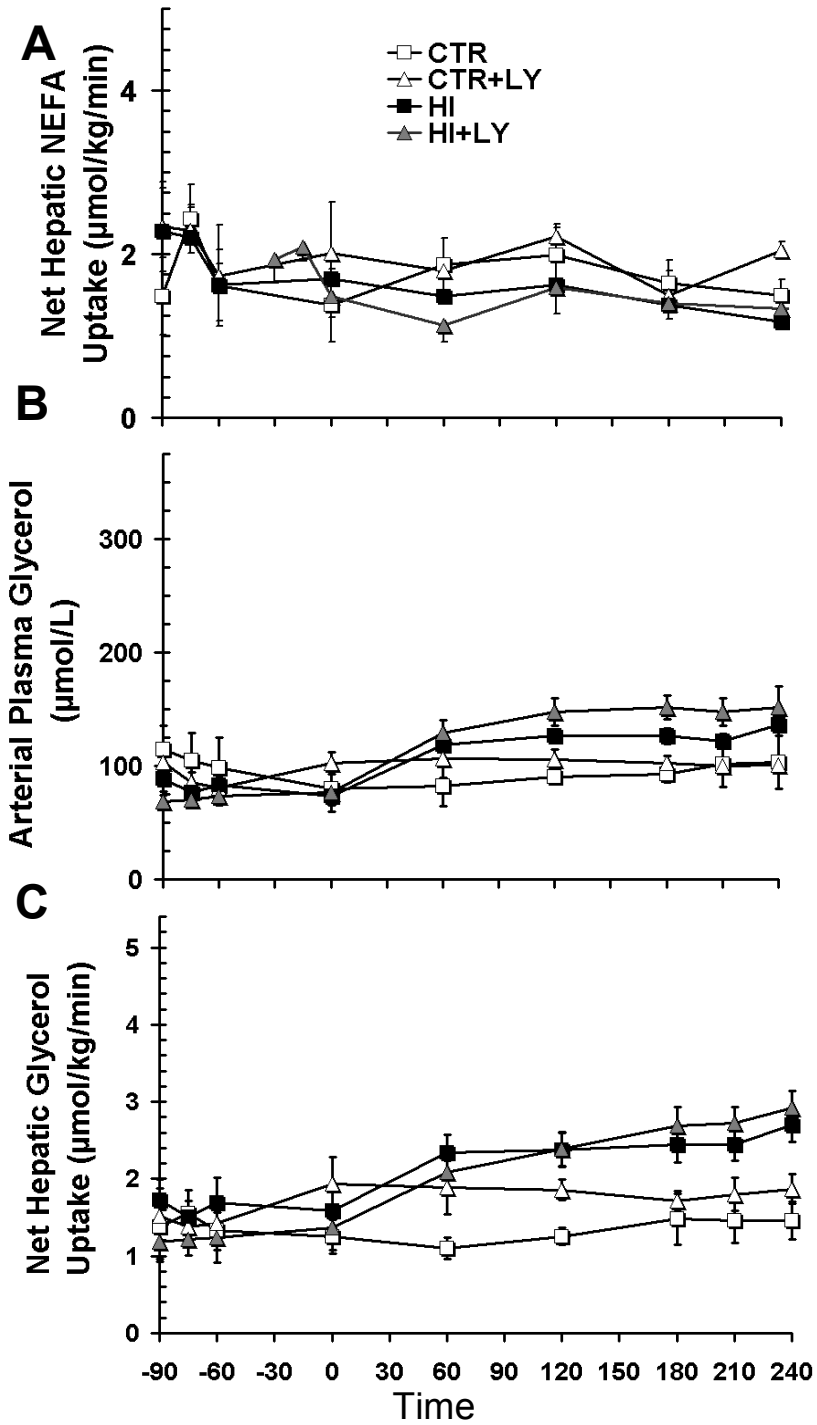

**Supplemental Figure Legend 2.** Effect of insulin administered through the head arteries in 42h fasted conscious dogs on the genetic regulation of key gluconeogenic regulators. (A) FOXO1 and PGC1 $\alpha$ . (B) SRC1 and SRC2. Values are means  $\pm$  SEM; n values same as for Figure 4.

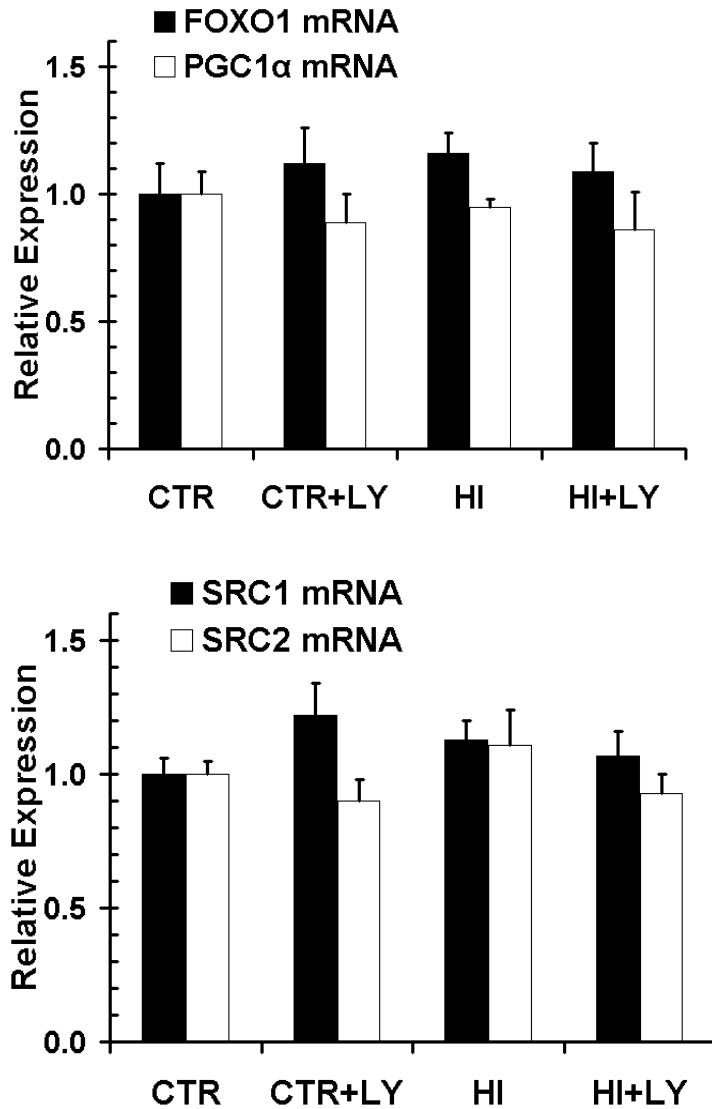

Supplementary Table 1. Arterial plasma levels (mean  $\pm$  S.E.M., n=5 in each group) of NEFA, cortisol, and catecholamines in the 18 h fasted conscious dog subjected to either artificial CSF (aCSF) or insulin (INS) infusion into the third ventricle during a basal insulin, basal glucagon pancreatic clamp.

|                                                                                             | Basal Period  | Experimental Period (min) |               |               |               |               |
|---------------------------------------------------------------------------------------------|---------------|---------------------------|---------------|---------------|---------------|---------------|
|                                                                                             |               | 60                        | 120           | 180           | 210           | 240           |
| <b>Arterial Plasma nonesterified fatty acid (NEFA) Level (<math>\mu\text{mol/L}</math>)</b> |               |                           |               |               |               |               |
| aCSF                                                                                        | 446 $\pm$ 60  | 484 $\pm$ 67              | 466 $\pm$ 76  | 554 $\pm$ 91  | 670 $\pm$ 102 | 644 $\pm$ 133 |
| INS                                                                                         | 666 $\pm$ 102 | 538 $\pm$ 117             | 563 $\pm$ 117 | 527 $\pm$ 109 | 555 $\pm$ 92  | 660 $\pm$ 137 |
| <b>Arterial Plasma Cortisol Level (ug/dl)</b>                                               |               |                           |               |               |               |               |
| aCSF                                                                                        | 3.4 $\pm$ 0.7 | 2.7 $\pm$ 0.4             | 1.8 $\pm$ 0.5 | 2.2 $\pm$ 0.5 | 2.9 $\pm$ 0.7 | 2.4 $\pm$ 0.7 |
| INS                                                                                         | 3.4 $\pm$ 1.1 | 2.6 $\pm$ 0.3             | 2.0 $\pm$ 0.4 | 2.4 $\pm$ 0.7 | 2.0 $\pm$ 0.6 | 2.7 $\pm$ 1.3 |
| <b>Arterial Plasma Epinephrine Level (pg/mL)</b>                                            |               |                           |               |               |               |               |
| aCSF                                                                                        | 99 $\pm$ 23   | 90 $\pm$ 25               | 72 $\pm$ 14   | 68 $\pm$ 7    | 80 $\pm$ 35   | 104 $\pm$ 38  |
| INS                                                                                         | 131 $\pm$ 30  | 149 $\pm$ 46              | 101 $\pm$ 31  | 89 $\pm$ 19   | 153 $\pm$ 53  | 179 $\pm$ 53  |
| <b>Arterial Plasma Norepinephrine (pg/mL)</b>                                               |               |                           |               |               |               |               |
| aCSF                                                                                        | 98 $\pm$ 20   | 74 $\pm$ 10               | 74 $\pm$ 17   | 88 $\pm$ 19   | 89 $\pm$ 19   | 93 $\pm$ 18   |
| INS                                                                                         | 160 $\pm$ 22  | 149 $\pm$ 31              | 135 $\pm$ 27  | 126 $\pm$ 23  | 183 $\pm$ 50  | 191 $\pm$ 46  |

Supplementary Table 2. Arterial blood concentration and net hepatic balance (mean  $\pm$  S.E.M., n=5 in each group) of gluconeogenic substrates in the 18 h fasted conscious dog subjected to either artificial CSF (aCSF) or insulin (INS) infusion into the third ventricle during a basal insulin, basal glucagon pancreatic clamp.

|                                                                                             | Basal Period      | Experimental Period (min) |                   |                   |                   |                   |
|---------------------------------------------------------------------------------------------|-------------------|---------------------------|-------------------|-------------------|-------------------|-------------------|
|                                                                                             |                   | 60                        | 120               | 180               | 210               | 240               |
| <b>Arterial Blood Lactate Concentration (<math>\mu\text{mol/L}</math>)</b>                  |                   |                           |                   |                   |                   |                   |
| <b>aCSF</b>                                                                                 | 762 $\pm$<br>249  | 759 $\pm$<br>241          | 677 $\pm$<br>202  | 575 $\pm$<br>174  | 550 $\pm$<br>147  | 516 $\pm$<br>125  |
| <b>INS</b>                                                                                  | 805 $\pm$<br>143  | 1018 $\pm$<br>227         | 991 $\pm$<br>142  | 1012 $\pm$<br>153 | 882 $\pm$<br>131  | 806 $\pm$<br>96   |
| <b>Arterial Blood Glycerol Concentration (<math>\mu\text{mol/L}</math>)</b>                 |                   |                           |                   |                   |                   |                   |
| <b>aCSF</b>                                                                                 | 99 $\pm$ 23       | 90 $\pm$ 25               | 72 $\pm$ 14       | 68 $\pm$ 7        | 80 $\pm$ 35       | 104 $\pm$ 38      |
| <b>INS</b>                                                                                  | 131 $\pm$ 30      | 149 $\pm$ 46              | 101 $\pm$ 31      | 89 $\pm$ 19       | 153 $\pm$ 53      | 179 $\pm$ 53      |
| <b>Arterial Blood Gluconeogenic Amino Acid Concentration (<math>\mu\text{mol/L}</math>)</b> |                   |                           |                   |                   |                   |                   |
| <b>aCSF</b>                                                                                 | 1928 $\pm$<br>153 | 1946 $\pm$<br>188         | 2024 $\pm$<br>156 | 1973 $\pm$<br>138 | 2048 $\pm$<br>161 | 1968 $\pm$<br>84  |
| <b>INS</b>                                                                                  | 1743 $\pm$<br>111 | 1871 $\pm$<br>141         | 1937 $\pm$<br>175 | 1966 $\pm$<br>187 | 1989 $\pm$<br>158 | 2020 $\pm$<br>181 |

Supplementary Table 3. Arterial plasma levels of NEFA, cortisol, and catecholamines in the 42 h fasted conscious dog subjected to either saline (CTR, CTR+LY) or insulin infusion (HI, HI+LY) in the head arteries with and without ICV infusion of the PI3K inhibitor LY. Values are mean  $\pm$  S.E.M., n=4, 4, 8 and 7 for CTR, CTR+LY, HI, and HI+LY animals, respectively.

|                                                  | Basal Period  | Experimental Period (min) |               |               |               |               |
|--------------------------------------------------|---------------|---------------------------|---------------|---------------|---------------|---------------|
|                                                  |               | 60                        | 120           | 180           | 210           | 240           |
| <b>Arterial Plasma Cortisol Level (ug/dl)</b>    |               |                           |               |               |               |               |
| <b>CTR</b>                                       | 3.4 $\pm$ 0.7 | 4.4 $\pm$ 0.5             | 4.6 $\pm$ 2.5 | 3.3 $\pm$ 1.3 | 4.1 $\pm$ 2.2 | 3.9 $\pm$ 1.4 |
| <b>CTR+LY</b>                                    | 3.7 $\pm$ 0.6 | 4.8 $\pm$ 0.9             | 4.2 $\pm$ 1.3 | 2.0 $\pm$ 0.5 | 3.3 $\pm$ 0.2 | 5.0 $\pm$ 1.6 |
| <b>HI</b>                                        | 2.8 $\pm$ 0.4 | 2.4 $\pm$ 0.4             | 2.2 $\pm$ 0.3 | 3.3 $\pm$ 1.2 | 3.3 $\pm$ 0.5 | 3.6 $\pm$ 0.5 |
| <b>HI+LY</b>                                     | 2.5 $\pm$ 0.3 | 3.0 $\pm$ 0.5             | 3.9 $\pm$ 0.6 | 2.9 $\pm$ 0.4 | 3.0 $\pm$ 0.4 | 4.4 $\pm$ 0.4 |
| <b>Arterial Plasma Epinephrine Level (pg/mL)</b> |               |                           |               |               |               |               |
| <b>CTR</b>                                       | 116 $\pm$ 21  | 136 $\pm$ 15              | 100 $\pm$ 15  | 134 $\pm$ 15  | 141 $\pm$ 22  | 131 $\pm$ 23  |
| <b>CTR+LY</b>                                    | 119 $\pm$ 28  | 214 $\pm$ 62              | 177 $\pm$ 55  | 120 $\pm$ 35  | 120 $\pm$ 26  | 146 $\pm$ 33  |
| <b>HI</b>                                        | 106 $\pm$ 15  | 109 $\pm$ 15              | 99 $\pm$ 17   | 115 $\pm$ 17  | 102 $\pm$ 15  | 124 $\pm$ 24  |
| <b>HI+LY</b>                                     | 86 $\pm$ 28   | 189 $\pm$ 53              | 196 $\pm$ 83  | 162 $\pm$ 49  | 120 $\pm$ 43  | 157 $\pm$ 56  |
| <b>Arterial Plasma Norepinephrine (pg/mL)</b>    |               |                           |               |               |               |               |
| <b>CTR</b>                                       | 137 $\pm$ 31  | 166 $\pm$ 23              | 105 $\pm$ 27  | 155 $\pm$ 26  | 175 $\pm$ 78  | 121 $\pm$ 24  |
| <b>CTR+LY</b>                                    | 120 $\pm$ 24  | 128 $\pm$ 19              | 128 $\pm$ 23  | 128 $\pm$ 23  | 141 $\pm$ 23  | 141 $\pm$ 22  |
| <b>HI</b>                                        | 106 $\pm$ 15  | 109 $\pm$ 15              | 99 $\pm$ 17   | 115 $\pm$ 17  | 102 $\pm$ 15  | 123 $\pm$ 24  |
| <b>HI+LY</b>                                     | 105 $\pm$ 21  | 140 $\pm$ 31              | 155 $\pm$ 42  | 172 $\pm$ 40  | 150 $\pm$ 35  | 174 $\pm$ 44  |

Supplementary Table 4. Arterial blood levels and net hepatic balance (mean  $\pm$  S.E.M., n per group same as Supplementary Table 3) for lactate and gluconeogenic amino acids in the 42 h fasted conscious dog subjected to selective head hyperinsulinemia.

|                                                                                             | Basal Period  | Experimental Period (min) |                |                |                |                |
|---------------------------------------------------------------------------------------------|---------------|---------------------------|----------------|----------------|----------------|----------------|
|                                                                                             |               | 60                        | 120            | 180            | 210            | 240            |
| <b>Arterial Blood Lactate Concentration (<math>\mu\text{mol/L}</math>)</b>                  |               |                           |                |                |                |                |
| <b>CTR</b>                                                                                  | 404 $\pm$ 41  | 433 $\pm$ 45              | 337 $\pm$ 19   | 355 $\pm$ 27   | 357 $\pm$ 36   | 352 $\pm$ 43   |
| <b>CTR+LY</b>                                                                               | 560 $\pm$ 106 | 600 $\pm$ 67              | 580 $\pm$ 76   | 666 $\pm$ 190  | 567 $\pm$ 115  | 552 $\pm$ 106  |
| <b>HI</b>                                                                                   | 424 $\pm$ 54  | 561 $\pm$ 67              | 555 $\pm$ 61   | 518 $\pm$ 64   | 545 $\pm$ 57   | 542 $\pm$ 70   |
| <b>HI+LY</b>                                                                                | 484 $\pm$ 157 | 685 $\pm$ 154             | 604 $\pm$ 187  | 528 $\pm$ 139  | 518 $\pm$ 130  | 563 $\pm$ 174  |
| <b>Net Hepatic Lactate Uptake (<math>\mu\text{mol/kg/min}</math>)</b>                       |               |                           |                |                |                |                |
| <b>CTR</b>                                                                                  | 4.5 $\pm$ 0.6 | 3.8 $\pm$ 1.1             | 3.9 $\pm$ 0.6  | 4.4 $\pm$ 0.5  | 5.1 $\pm$ 0.6  | 4.7 $\pm$ 0.7  |
| <b>CTR+LY</b>                                                                               | 3.9 $\pm$ 0.4 | 3.1 $\pm$ 0.7             | 5.7 $\pm$ 0.9  | 4.8 $\pm$ 0.8  | 4.6 $\pm$ 0.4  | 4.8 $\pm$ 0.4  |
| <b>HI</b>                                                                                   | 4.8 $\pm$ 0.8 | 3.5 $\pm$ 1.9             | 3.5 $\pm$ 1.4  | 3.8 $\pm$ 1.1  | 3.7 $\pm$ 1.1  | 4.1 $\pm$ 1.2  |
| <b>HI+LY</b>                                                                                | 4.0 $\pm$ 0.6 | 2.7 $\pm$ 0.8             | 3.7 $\pm$ 0.8  | 4.4 $\pm$ 1.1  | 4.2 $\pm$ 0.8  | 3.7 $\pm$ 0.7  |
| <b>Arterial Blood Gluconeogenic Amino Acid Concentration (<math>\mu\text{mol/L}</math>)</b> |               |                           |                |                |                |                |
| <b>CTR</b>                                                                                  | 1621 $\pm$ 62 | 1623 $\pm$ 31             | 1645 $\pm$ 62  | 1617 $\pm$ 59  | 1561 $\pm$ 40  | 1645 $\pm$ 65  |
| <b>CTR+LY</b>                                                                               | 1743 $\pm$ 49 | 1746 $\pm$ 89             | 1771 $\pm$ 68  | 1823 $\pm$ 104 | 1753 $\pm$ 90  | 1744 $\pm$ 89  |
| <b>HI</b>                                                                                   | 1850 $\pm$ 22 | 1799 $\pm$ 127            | 1728 $\pm$ 131 | 1653 $\pm$ 121 | 1631 $\pm$ 108 | 1539 $\pm$ 145 |
| <b>HI+LY</b>                                                                                | 1800 $\pm$ 62 | 1802 $\pm$ 77             | 1741 $\pm$ 106 | 1668 $\pm$ 132 | 1648 $\pm$ 104 | 1657 $\pm$ 80  |
| <b>Net Hepatic Gluconeogenic Amino Acid Uptake (<math>\mu\text{mol/kg/min}</math>)</b>      |               |                           |                |                |                |                |
| <b>CTR</b>                                                                                  | 2.3 $\pm$ 0.7 | 3.7 $\pm$ 0.8             | 5.9 $\pm$ 0.7  | 2.3 $\pm$ 1.1  | 2.1 $\pm$ 1.4  | 3.0 $\pm$ 1.0  |
| <b>CTR+LY</b>                                                                               | 3.1 $\pm$ 0.6 | 3.7 $\pm$ 0.7             | 3.1 $\pm$ 1.4  | 3.3 $\pm$ 1.0  | 4.7 $\pm$ 1.2  | 3.7 $\pm$ 0.9  |
| <b>HI</b>                                                                                   | 3.1 $\pm$ 0.6 | 3.0 $\pm$ 0.8             | 2.2 $\pm$ 0.5  | 3.0 $\pm$ 0.9  | 2.9 $\pm$ 0.6  | 3.6 $\pm$ 0.9  |
| <b>HI+LY</b>                                                                                | 3.7 $\pm$ 0.7 | 3.7 $\pm$ 0.7             | 2.7 $\pm$ 0.4  | 2.0 $\pm$ 0.7  | 1.8 $\pm$ 0.7  | 1.8 $\pm$ 0.7  |

Supplementary Table 5. Metabolic data comparing Head insulin infused group (HI) to head insulin infused animals previously subjected to hepatic denervation (HI+DN).  
<sup>†</sup>P<0.05 difference versus basal period; \*P<0.05 difference between HI and HI+DN animals.

|                                        | <b>HI group (n=8)</b>           |                                | <b>HI+DN group (n=4)</b>        |                                |
|----------------------------------------|---------------------------------|--------------------------------|---------------------------------|--------------------------------|
|                                        | <b>BASAL<br/>(-90 to 0 min)</b> | <b>CLAMP<br/>(180-240 min)</b> | <b>BASAL<br/>(-90 to 0 min)</b> | <b>CLAMP<br/>(180-240 min)</b> |
| Arterial Plasma Glucose (mg/dL)        | 111 ± 2                         | 110 ± 2                        | 104 ± 6                         | 106 ± 5                        |
| Jugular Vein Plasma Insulin (uU/mL)    | 3.8 ± 0.5                       | 26.1 ± 3.3 <sup>†</sup>        | 2.9 ± 0.3                       | 28.1 ± 1.9 <sup>†</sup>        |
| Hepatic Vein Plasma Insulin (uU/mL)    | 6.2 ± 0.7                       | 7.0 ± 1.0                      | 4.3 ± 1.0                       | 4.4 ± 0.6                      |
| Portal Vein Plasma Glucagon (ng/mL)    | 55 ± 4                          | 56 ± 5                         | 43 ± 3                          | 44 ± 7                         |
| Arterial Plasma NEFA (umol/kg/min)     | 842 ± 97                        | 716 ± 56                       | 682 ± 115                       | 593 ± 133                      |
| Net Hepatic Glucose Output (mg/kg/min) | 1.60 ± 0.13                     | 0.97 ± 0.29 <sup>†</sup>       | 1.35 ± 0.18                     | 0.71 ± 0.14 <sup>†</sup>       |

Supplementary Table 6. Molecular signaling data comparing Head insulin infused group (HI) to head insulin infused animals previously subjected to hepatic denervation (HI+DN). Data are means of averages from liver lobe 2, 3, and 7 and expressed relative to measurements in CTR group (basal insulin, basal glucagon, ICV infusion of aCSF). \*P<0.05 difference CTR group; #P<0.05 difference between HI and HI+DN animals.

|                                     | <b>CTR (n=4)</b> | <b>HI (n=8)</b> | <b>HI+DN (n=4)</b> |
|-------------------------------------|------------------|-----------------|--------------------|
| Hepatic P-Akt/Total Akt             | 1.00 ± 0.09      | 1.07 ± 0.15     | 1.05 ± 0.16        |
| Hypothalamic P-Akt/Total Akt        | 1.00 ± 0.08      | 2.81 ± 0.45*    | 2.53 ± 0.21*       |
| Hepatic P-STAT3/Total STAT3 protein | 1.00 ± 0.04      | 1.71 ± 0.15*    | 1.33 ± 0.08*#      |
| Hepatic PEPCK mRNA expression       | 1.00 ± 0.09      | 0.46 ± 0.03*    | 0.73 ± 0.02*#      |
| Hepatic PC mRNA expression          | 1.00 ± 0.08      | 0.52 ± 0.04*    | 1.26 ± 0.14#       |
| Hepatic G6Pase mRNA expression      | 1.00 ± 0.13      | 0.44 ± 0.02*    | 0.51 ± 0.06*       |
| Hepatic GK mRNA expression          | 1.00 ± 0.06      | 2.85 ± 0.20*    | 1.78 ± 0.11*#      |
| Hepatic GSK3β mRNA expression       | 1.00 ± 0.09      | 0.59 ± 0.05*    | 0.87 ± 0.13        |
| Hepatic GSK3β protein expression    | 1.00 ± 0.12      | 0.75 ± 0.07     | 0.82 ± 0.13        |
| Hepatic P-GS/Total GS protein       | 1.00 ± 0.04      | 0.80 ± 0.07*    | 0.80 ± 0.15        |



**Supplemental Table 7. Nucleotide sequences of dog-specific primers for Real-Time PCR.**

| Gene                   | Primer  | Sequence (5'-3')         | Temp. (°C) |
|------------------------|---------|--------------------------|------------|
| PEPCK                  | Forward | AGCTTTCAATGCCCGATTTCCAGG | 57         |
|                        | Reverse | TCAGCTCGATGCCGATCTTTGACA |            |
| G6Pase                 | Forward | TGAAACTTTCAGCCACATCCG    | 56         |
|                        | Reverse | GCAGGTAAAATCCAAGTGCGAA   |            |
| Pyruvate Carboxylase   | Forward | AATTCTCTAACACCTATGGCTTCC | 56         |
|                        | Reverse | GTGGCGTGGCTTCTCAATG      |            |
| FOXO1                  | Forward | CTACGAGTGGATGGTCAAGAG    | 55         |
|                        | Reverse | CACGAATGAACTTGCTATGTAGG  |            |
| PGC1 $\alpha$          | Forward | GCTTTCTGGGTGGACTCAAGTG   | 59         |
|                        | Reverse | GCAAGTTCGCCTCGTTCTCTTC   |            |
| SRC1                   | Forward | CAATGACCAAACCTGCTCCTGAAG | 60         |
|                        | Reverse | GACCGCACCATCCATCCTCTC    |            |
| SRC2                   | Forward | CACCTGTGCTGCTGCTAC       | 55         |
|                        | Reverse | GCTTGTGTTGGCTATACTGAG    |            |
| GK                     | Forward | CAGAGGGGACTTTGAAATG      | 57         |
|                        | Reverse | ATGAATCCTTACCCACAATC     |            |
| HPRT                   | Forward | AGCTTGCTGGTGAAAAGGAC     | 55         |
|                        | Reverse | TTATAGTCAAGGGCATATCC     |            |
| FOXO1                  | Forward | TCGCAGACTATGAAGCCTATG    | 55         |
|                        | Reverse | CCTTAATTGTTCCGGTCACTAGAG |            |
| Glycogen Synthase      | Forward | CTCAGGTGGAACAGTGTGAAC    | 56         |
|                        | Reverse | CCAAGCCGAATAGCCTATGTC    |            |
| Glycogen phosphorylase | Forward | TCGCAGACTATGAAGCCTATG    | 55         |
|                        | Reverse | CCTTAATTGTTCCGGTCACTAGAG |            |
| Glucokinase            | Forward | CAGAGGGGACTTTGAAATG      | 57         |
|                        | Reverse | ATGAATCCTTACCCACAATC     |            |

|              |         |                          |    |
|--------------|---------|--------------------------|----|
| GSK3 $\beta$ | Forward | CCACTGTAACATAGTCCGATTGC  | 57 |
|              | Reverse | TCCAGCACCAGATTAAGATAGACC |    |
| HPRT         | Forward | AGCTTGCTGGTGAAAAGGAC     | 55 |
|              | Reverse | TTATAGTCAAGGGCATATCC     |    |
